# Supplementary material for: C-Reactive Protein Knock Out Attenuate Temporomandibular Joint Inflammation in Rats
Source: Research Square preprint supplement (doi:10.21203/rs.3.rs-115377/v1), 2020-12-01

C-reactive protein knock out attenuate temporomandibular joint inflammation in rats

Yao He1,2, Mengjiao Zhou1,3, Zixiang Jian1,2, Lingli Fang1,2, Lan Huang1,3, Jinlin Song1,3*

**Supplemental Figure.1 Identification of CRP knockout in rats**


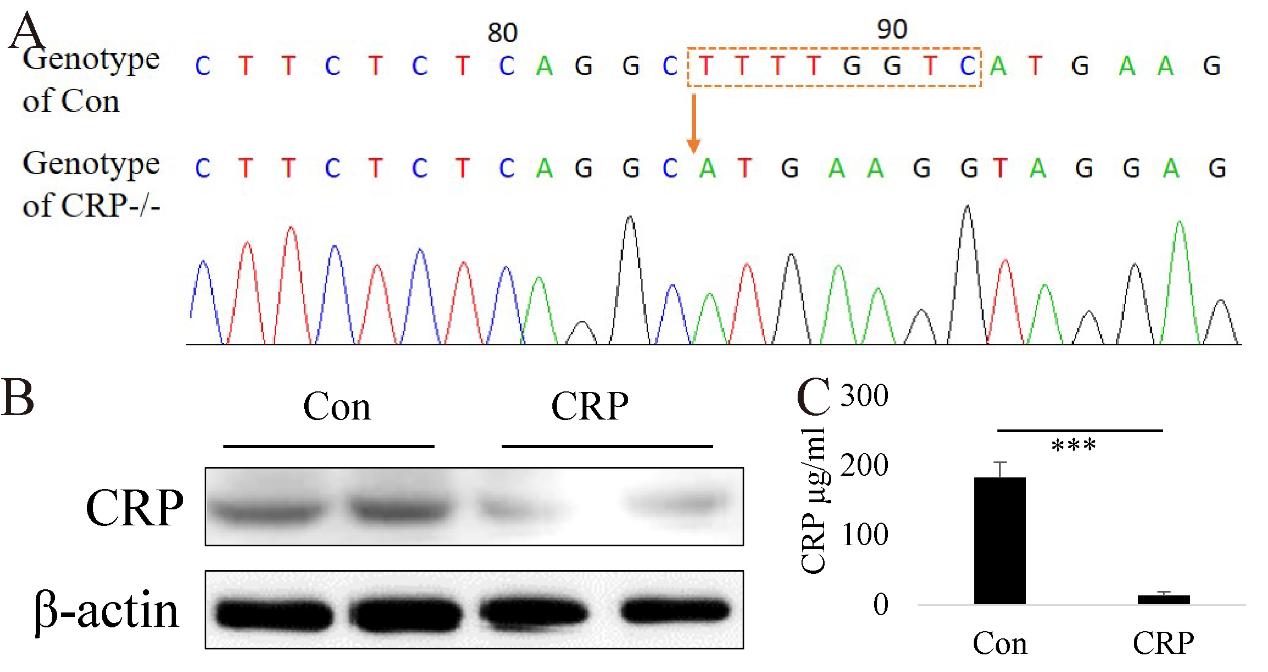
 (A) Sequencing chromatogram of CPR -/- rats. The bases in orange box missed in CPR -/- rats. (B) CRP protein expression of hepatic tissue (each protein with 2 parallels). (C) Serum CRP level between Control and CRP group (N=4; mean+SD; ***p < 0.001).

**Supplemental Figure.2 CRP expression after CFA induction**


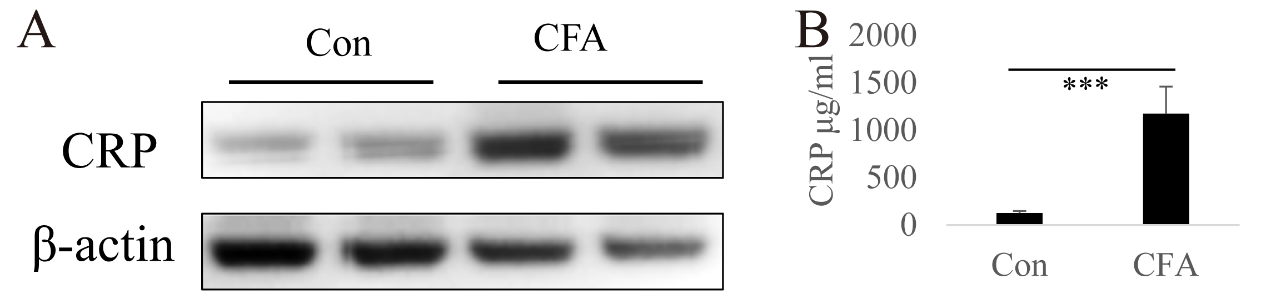
 (A) CRP protein expression of hepatic tissue (each protein with 2 parallels). (B) Serum CRP level between Control and CFA group (N=4; mean+SD; ***p < 0.001).

**Supplemental Table. Primers used for RT-qPCR**


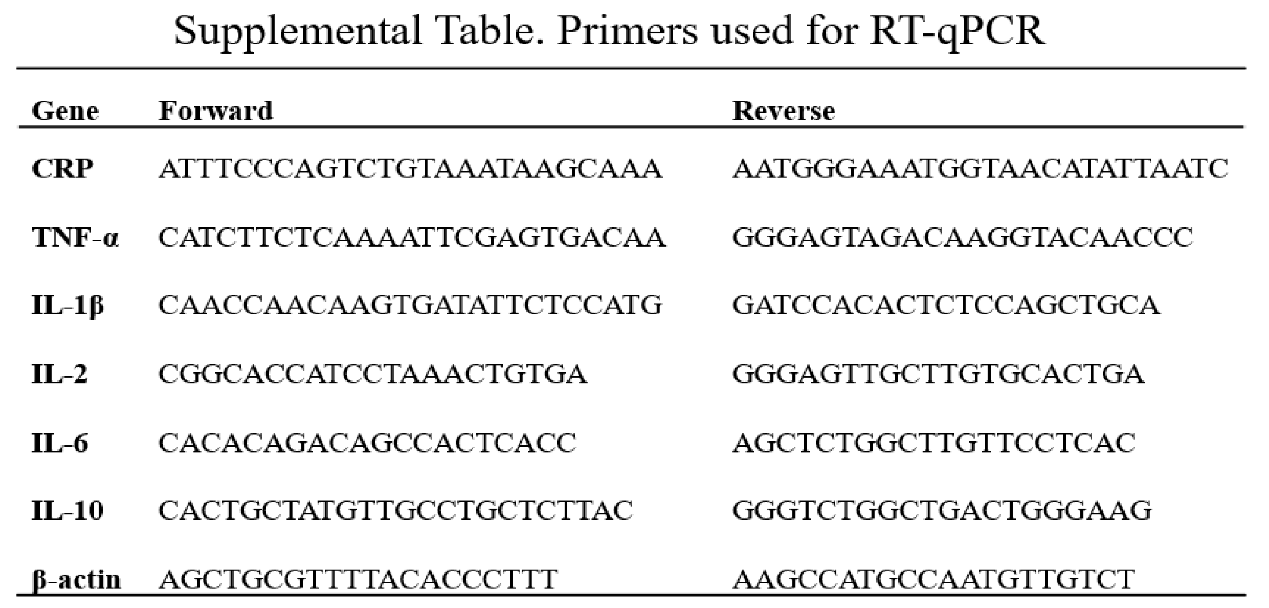

Supplement: Supplementary file 1 [file 6bbba901eff5c020e35c980e.docx]
